# Supplementary material
Source: Springer Nature journal article supplement (https://www.springermedizin.de/resource/supplementary/12885_2013_4227_MOESM5_ESM.pdf/9465848)
Supplement: MOESM5 [file 9465848]

| <b>Predictive factors for early death under therapy</b> |      |       |               |         |
|---------------------------------------------------------|------|-------|---------------|---------|
|                                                         | dead | alive | Relative Risk | p-value |
| <b>vascular co-morbidities</b>                          |      |       |               |         |
| <b>present</b>                                          | 6    | 30    | 3.83          | 0.09    |
| <b>absent</b>                                           | 2    | 44    |               |         |
| <b>no data</b>                                          | 1    | 84    |               |         |
| <b>Alcohol consumption</b>                              |      |       |               |         |
| <b>yes</b>                                              | 8    | 80    | 5.27          | 0.11    |
| <b>no</b>                                               | 1    | 57    |               |         |
| <b>no data</b>                                          |      | 21    |               |         |
| <b>Nicotine consumption</b>                             |      |       |               |         |
| <b>yes</b>                                              | 8    | 86    | 6.2           | 0.081   |
| <b>no</b>                                               | 1    | 72    |               |         |
| <b>Hemoglobin</b>                                       |      |       |               |         |
| <b>below normal range</b>                               | 6    | 25    | 3.09          | 0.09    |
| <b>normal</b>                                           | 3    | 45    |               |         |
| <b>no data</b>                                          | 0    | 88    |               |         |
| <b>albumin</b>                                          |      |       |               |         |
| <b>below normal range</b>                               | 5    | 28    | 2.07          | 0.29    |
| <b>normal</b>                                           | 3    | 38    |               |         |
| <b>no data</b>                                          | 1    | 92    |               |         |

Figure 3
